# Supplementary material for: In-depth resistome analysis by targeted metagenomics
Source: PubMed Central journal article supplement (PMC5769438; doi:10.1186/s40168-017-0387-y), 2018-01-15

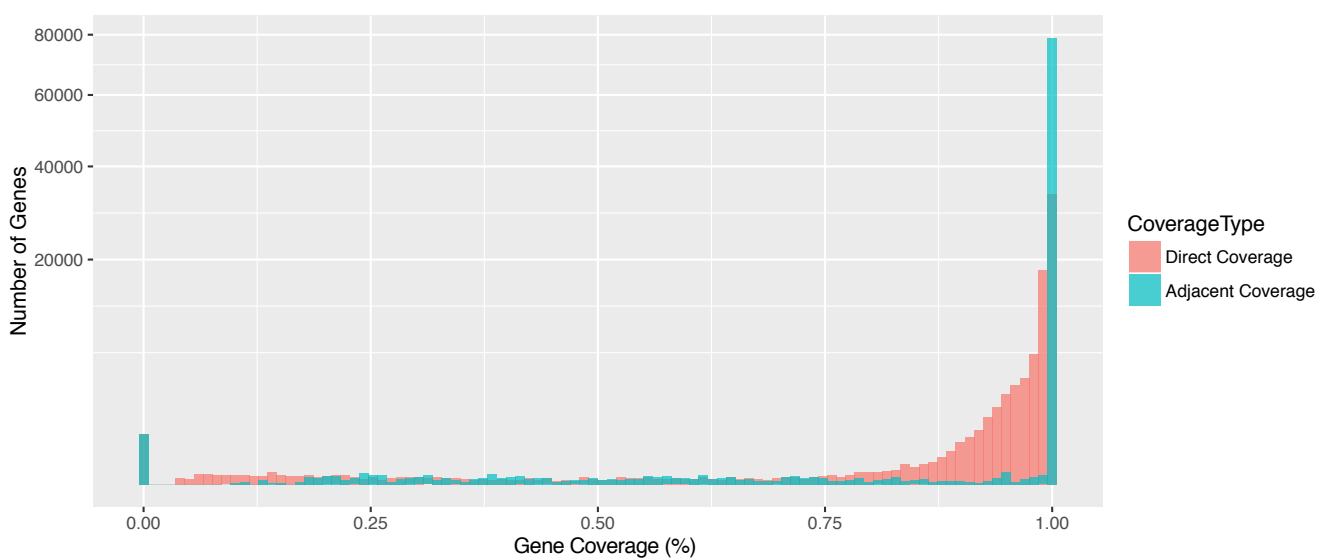

Supplement: 40168_2017_387_MOESM1_ESM.pdf [file 40168_2017_387_MOESM1_ESM.pdf]
